# Supplementary material for: Specificity of TGF-β1 signal designated by LRRC33 and integrin αVβ8
Source: PubMed Central journal article supplement (PMC9411592; doi:10.1038/s41467-022-32655-9), 2022-08-25
Supplement: 41467_2022_32655_MOESM1_ESM.pdf [file 41467_2022_32655_MOESM1_ESM.pdf]

**Supplementary Information for**  
**Specificity of TGF- $\beta$ 1 Signal Designated by**  
**LRRC33 and Integrin  $\alpha_v\beta_8$**

Zelin Duan<sup>1#</sup>, Xuezhen Lin<sup>2#</sup>, Lixia Wang<sup>2#</sup>, Qiuxin Zhen<sup>1</sup>, Yuefeng Jiang<sup>1</sup>, Chuxin Chen<sup>1</sup>, Jing Yang<sup>1</sup>, Chia-Hsueh Lee<sup>3</sup>, Yan Qin<sup>4</sup>, Ying Li<sup>2</sup>, Bo Zhao<sup>2\*</sup>, Jianchuan Wang<sup>5\*</sup>, Zhe Zhang<sup>1\*</sup>

<sup>1</sup>State Key Laboratory of Membrane Biology, Center for Life Sciences, School of Life Sciences, Peking University, Beijing 100871, China

<sup>2</sup>Molecular Cancer Research Center, School of Medicine, Shenzhen Campus of Sun Yat-sen University, No. 66, Gongchang Road, Guangming District, Shenzhen, Guangdong 518107, China

<sup>3</sup>Department of Structural Biology, St. Jude Children's Research Hospital, Memphis, TN 38105, United States

<sup>4</sup>Fuhong Therapeutics, 99 Hayden Ave d100, Lexington, MA 02421, United States

<sup>5</sup>Center for Translational Research, Shenzhen Bay Laboratory, Shenzhen, Guangdong 518007, China

<sup>#</sup>These authors contributed equally to this work

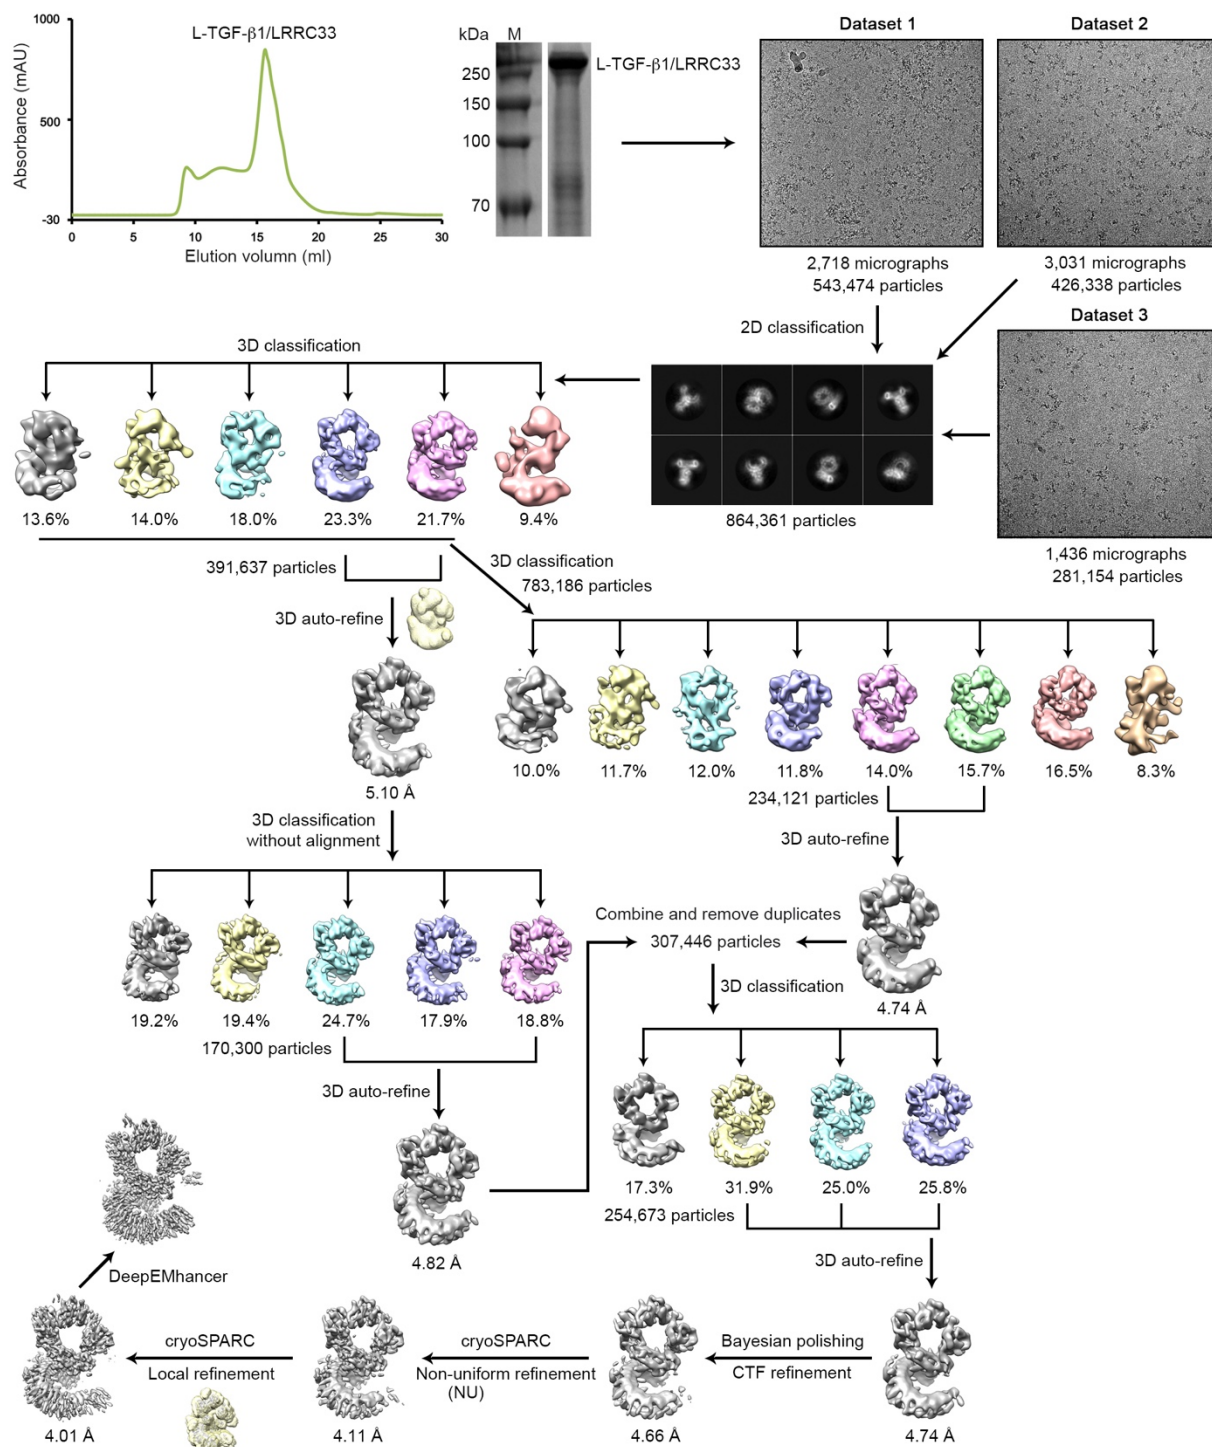

**Supplementary Fig. 1 Cryo-EM analysis of the L-TGF- $\beta$ 1/LRRC33 complex.**

Work flow for the purification and cryo-EM data processing of the L-TGF- $\beta$ 1/LRRC33 complex. The size exclusion chromatography (SEC) experiment was repeated three times independently with similar results. Source data are provided as a Source Data file.

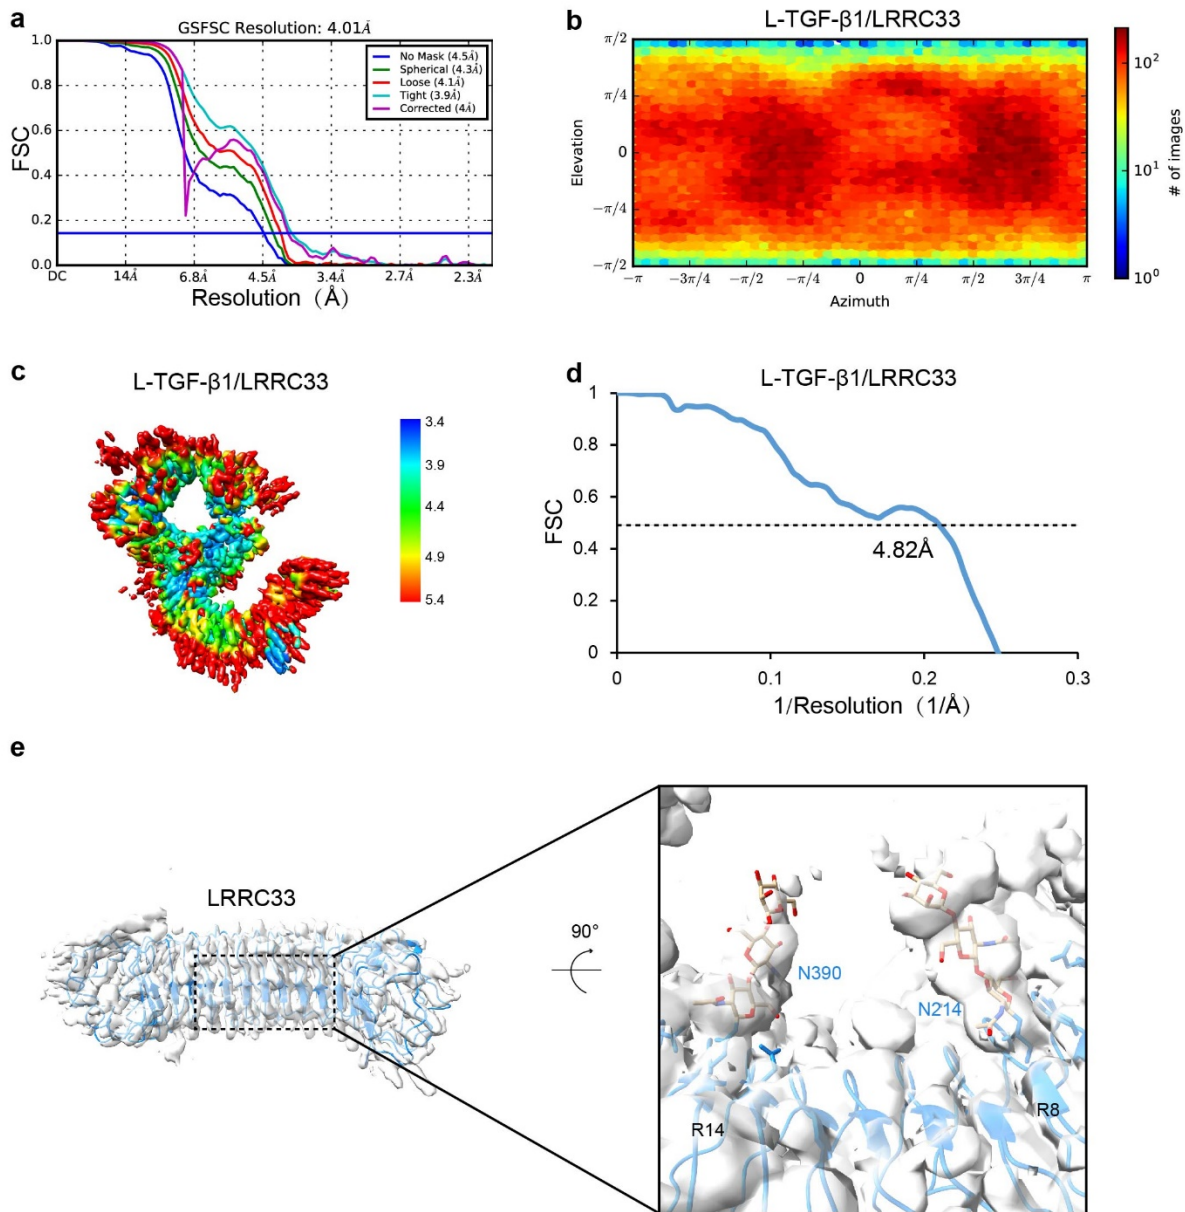

**Supplementary Fig. 2 Assessment of the cryo-EM data and structural model for the L-TGF- $\beta$ 1/LRRC33 complex.**

**a** Fourier Shell Correlation (FSC) curves between reconstructions of two half-datasets. **b** Angular distributions of all the particles used for the reconstruction. **c** Local resolution estimation for the cryo-EM map. The contour level is 0.294. **d** FSC curve between the refined structure and the cryo-EM map. **e** Cryo-EM densities of LRRC33. The contour level is 0.251. The linked N-glycans to Asn214 and Asn390 are indicated.

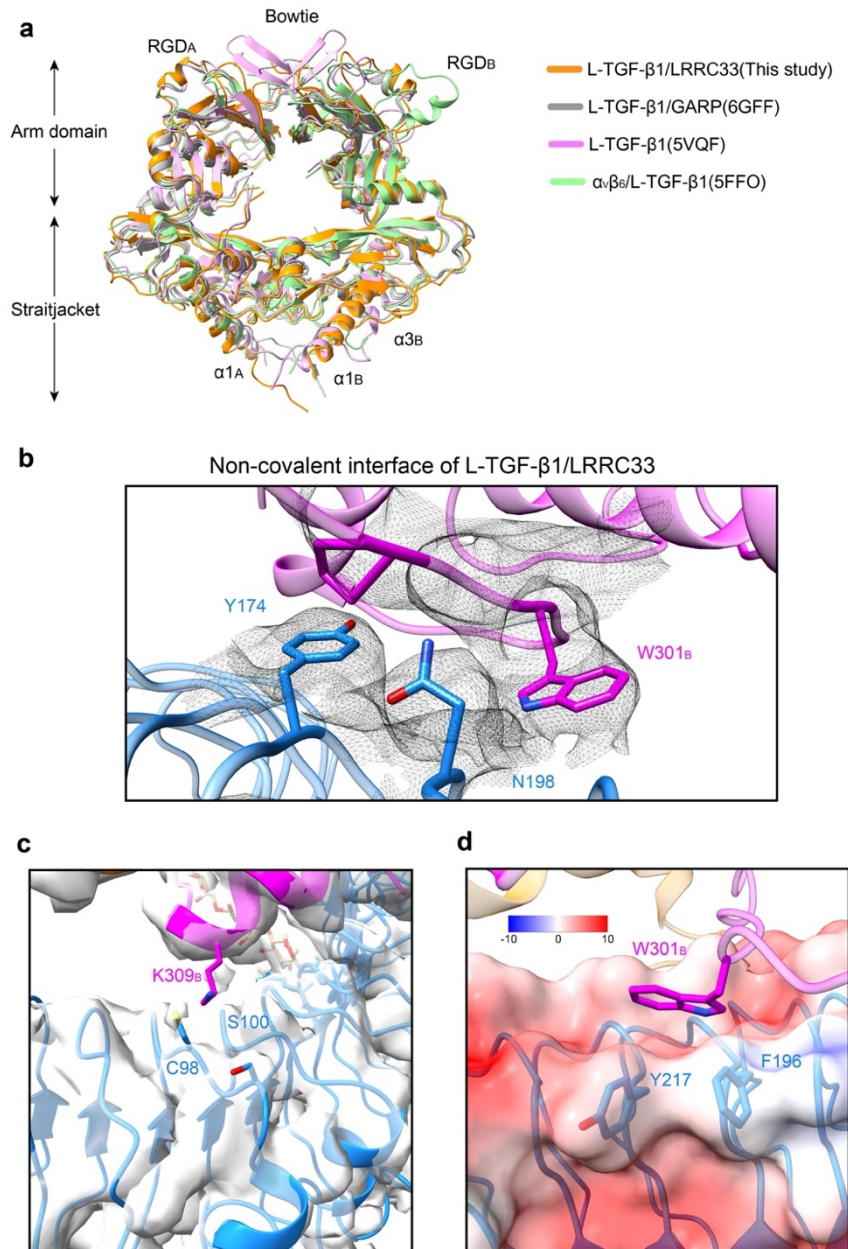

**Supplementary Fig. 3 Structural analyses of the L-TGF-β1/LRRC33 complex.**

**a** Comparison of the L-TGF-β1 structure with the reported ones. **b** Cryo-EM densities of the core non-covalent interface between L-TGF-β1 and LRRC33. The contour level is 0.202. The side chains of Trp301 on L-TGF-β1, and Tyr174 and Asn198 on LRRC33 are shown. **c** Cryo-EM densities of the marginal non-covalent interface between L-TGF-β1 and LRRC33. The contour level is 0.251. The side chains of Lys309 on L-TGF-β1, and Cys98 and Ser100 on LRRC33 are shown. **d** Surface electron potential (in units of  $k_B T/e$ , where  $k_B$  is the Boltzmann constant,  $T$  is the absolute temperature, and  $e$  is the elementary charge) of the L-TGF-β1 Trp301 binding pocket on LRRC33, as calculated at pH 7.0 and 0.15 M concentrations of monovalent cations and anions.

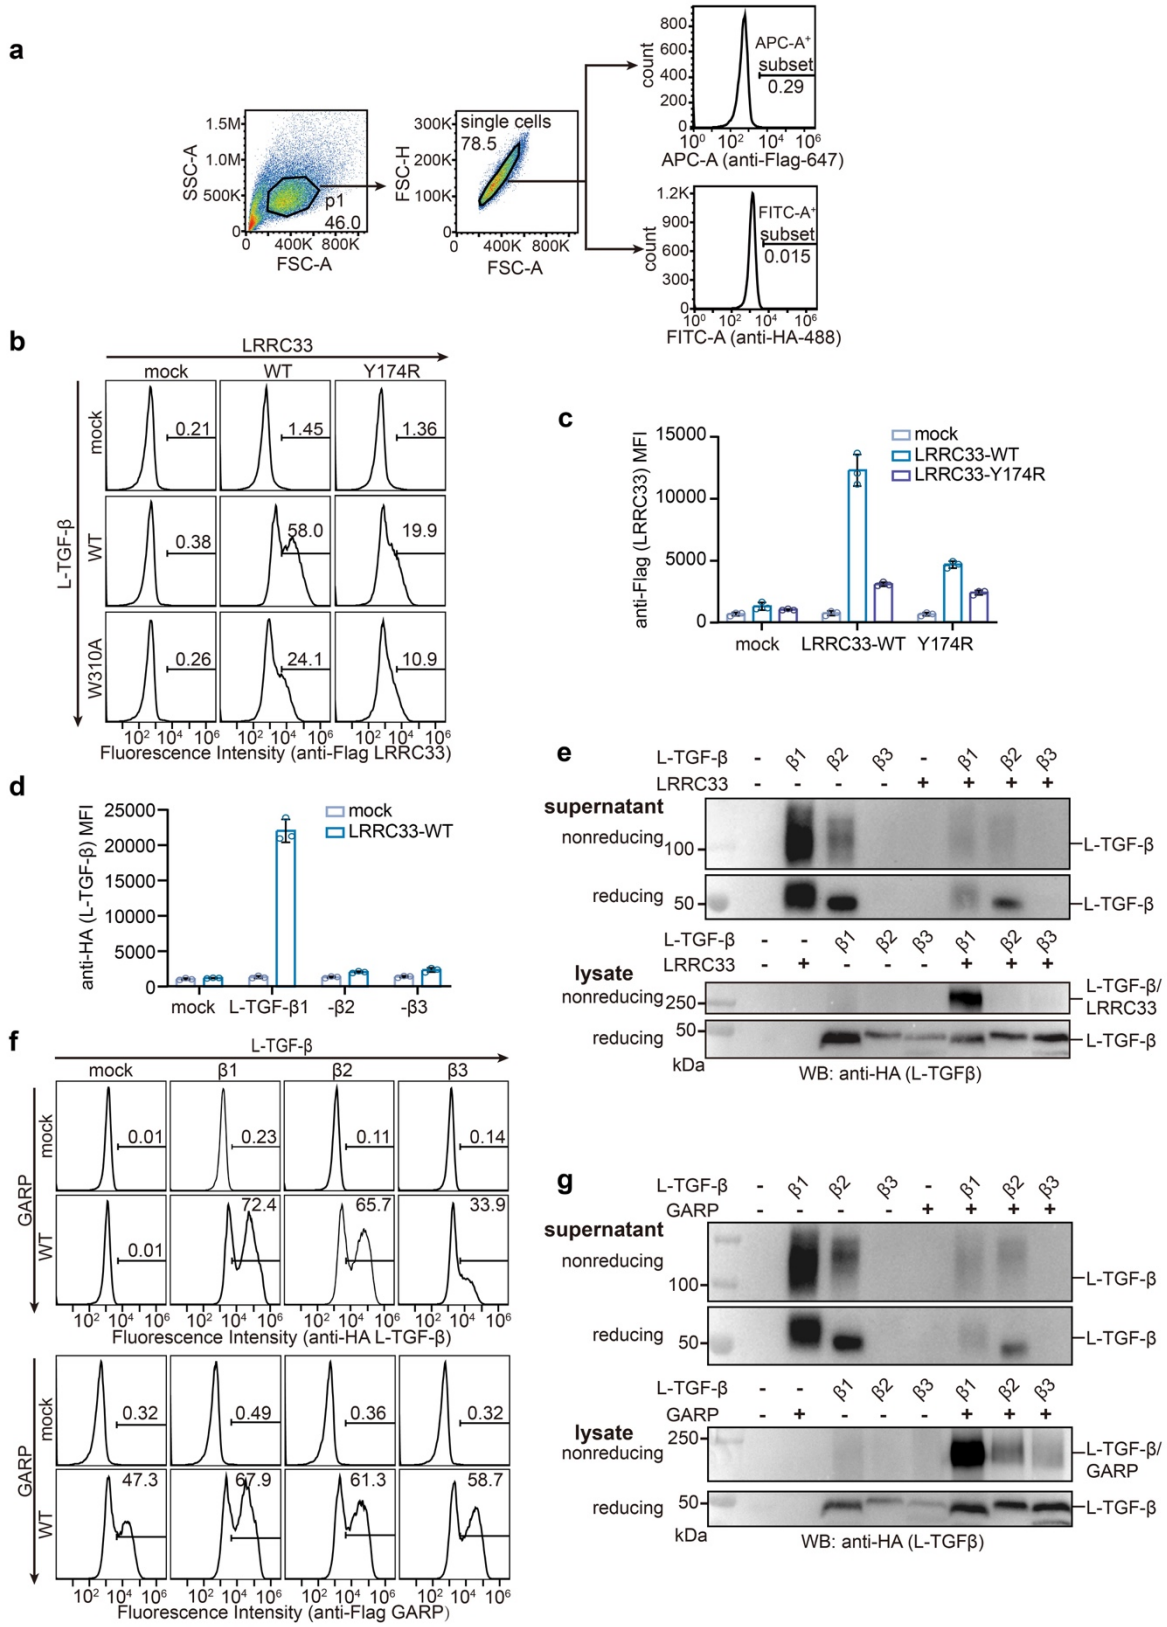

**Supplementary Fig. 4 Surface presentation of different L-TGF- $\beta$  variants by LRRC33 and/or GARP.**

**a** Representative flow cytometry gating strategy for cell surface presentation of LRRC33, GARP, and L-TGF- $\beta$ . **b** Surface expression of LRRC33 on transfected Expi293F cells were measured by flow cytometry (anti-Flag). Number in each histogram indicates the percentage of LRRC33+ (anti-Flag+) subset. **c** MFI (Mean Fluorescence Intensity) of LRRC33 (anti-Flag) on differently transfected Expi293F cells. All experiments were done in triplicate (n = 3 biologically independent experiments, mean  $\pm$  s.d.). **d** MFI (Mean Fluorescence Intensity) of cell surface L-TGF- $\beta$  isoforms (anti-HA). All experiments were done in triplicate (n = 3 biologically independent experiments, mean  $\pm$  s.d.). **e** Culture supernatants and total lysates of Expi293F cells transfected with indicated plasmids were subjected to non-reducing and reducing western blot analyses with anti-HA antibody (for L-TGF- $\beta$ ). The experiment was repeated three times independently with similar results. **f** Surface presentation of L-TGF- $\beta$ 1, - $\beta$ 2, and - $\beta$ 3 and GARP measured by flow cytometry (anti-HA for L-TGF- $\beta$  staining, and anti-Flag for GARP staining). **g** Culture supernatants and total lysates of Expi293F cells transfected with indicated plasmids were subjected to non-reducing and reducing western blot analyses with anti-HA antibody (for L-TGF- $\beta$ ). The experiment was repeated three times independently with similar results. Source data are provided as a Source Data file.

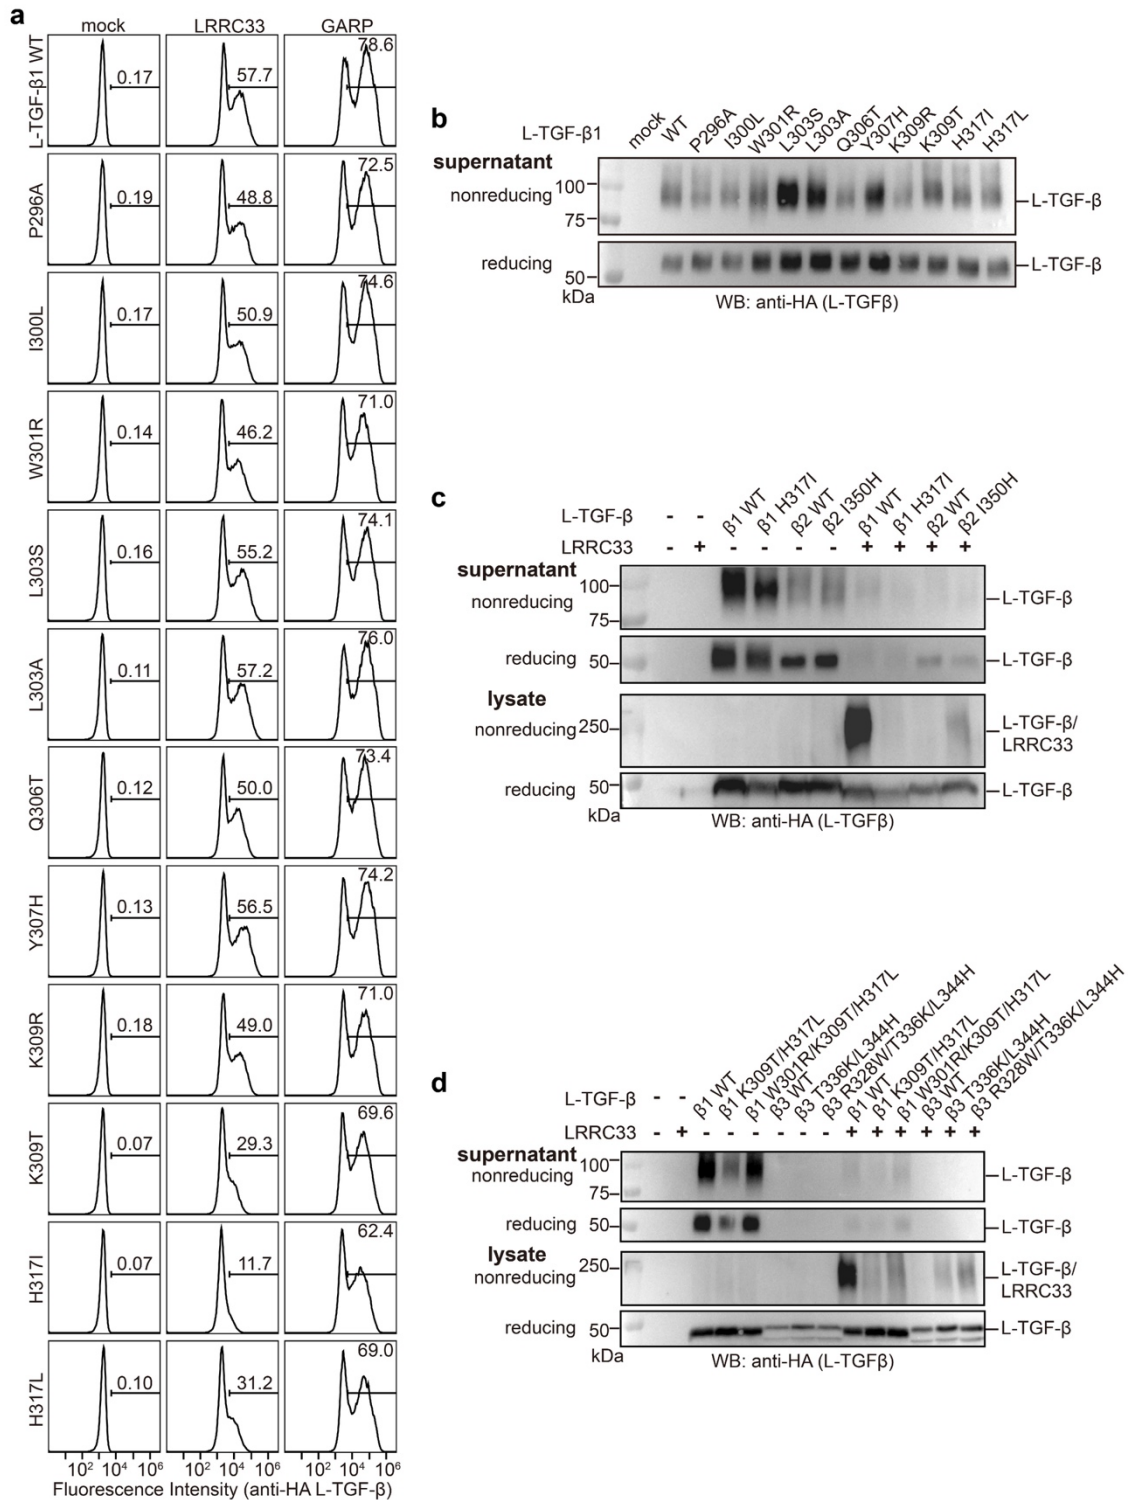

**Supplementary Fig. 5 Mapping for specificity determining residues on L-TGF- $\beta$ 1 for LRRC33 complex formation.**

**a** Surface expression of L-TGF- $\beta$ 1 single mutations by LRRC33 and GARP measured by flow cytometry (anti-HA). Number in each histogram indicates the percentage of L-TGF- $\beta$ 1+ (anti-

HA+) subset. **b** Culture supernatants of Expi293F cells transfected with indicated plasmids were subjected to non-reducing and reducing western blot analyses with anti-HA antibody (for L-TGF- $\beta$ ). The experiment was repeated three times independently with similar results. **c-d** Culture supernatants and total lysates of Expi293F cells transfected with indicated plasmids were subjected to non-reducing and reducing western blot analyses with anti-HA antibody (for L-TGF- $\beta$ ). The experiment was repeated three times independently with similar results. Source data are provided as a Source Data file.



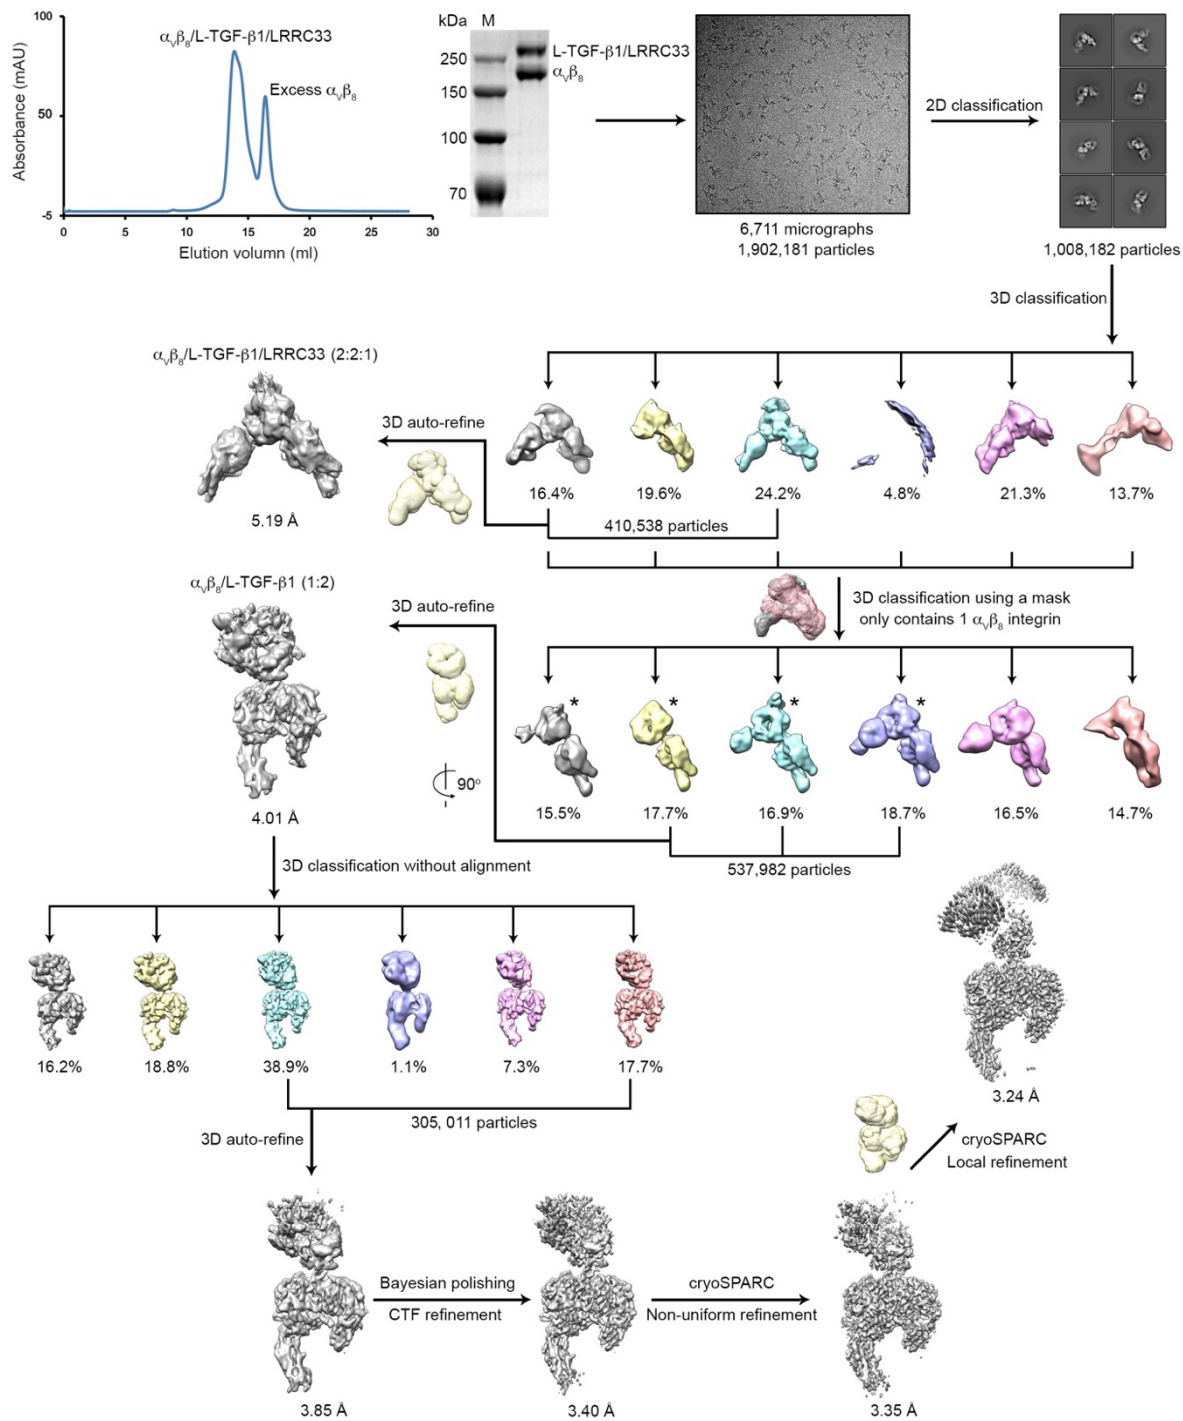

**Supplementary Fig. 6 Cryo-EM analysis of the  $\alpha_v\beta_8$ /L-TGF- $\beta$ 1/LRRC33 ternary complex.**

Work flow for the purification and cryo-EM data processing of the  $\alpha_v\beta_8$ /L-TGF- $\beta$ 1/LRRC33 complex. The 2:2:1  $\alpha_v\beta_8$ /L-TGF- $\beta$ 1/LRRC33 complex was refined to medium-resolution (5.19 Å), whereas the 1:2  $\alpha_v\beta_8$ /L-TGF- $\beta$ 1 complex was refined to high-resolution (3.24 Å). The size exclusion chromatography (SEC) experiment was repeated three times independently with similar results. Source data are provided as a Source Data file.

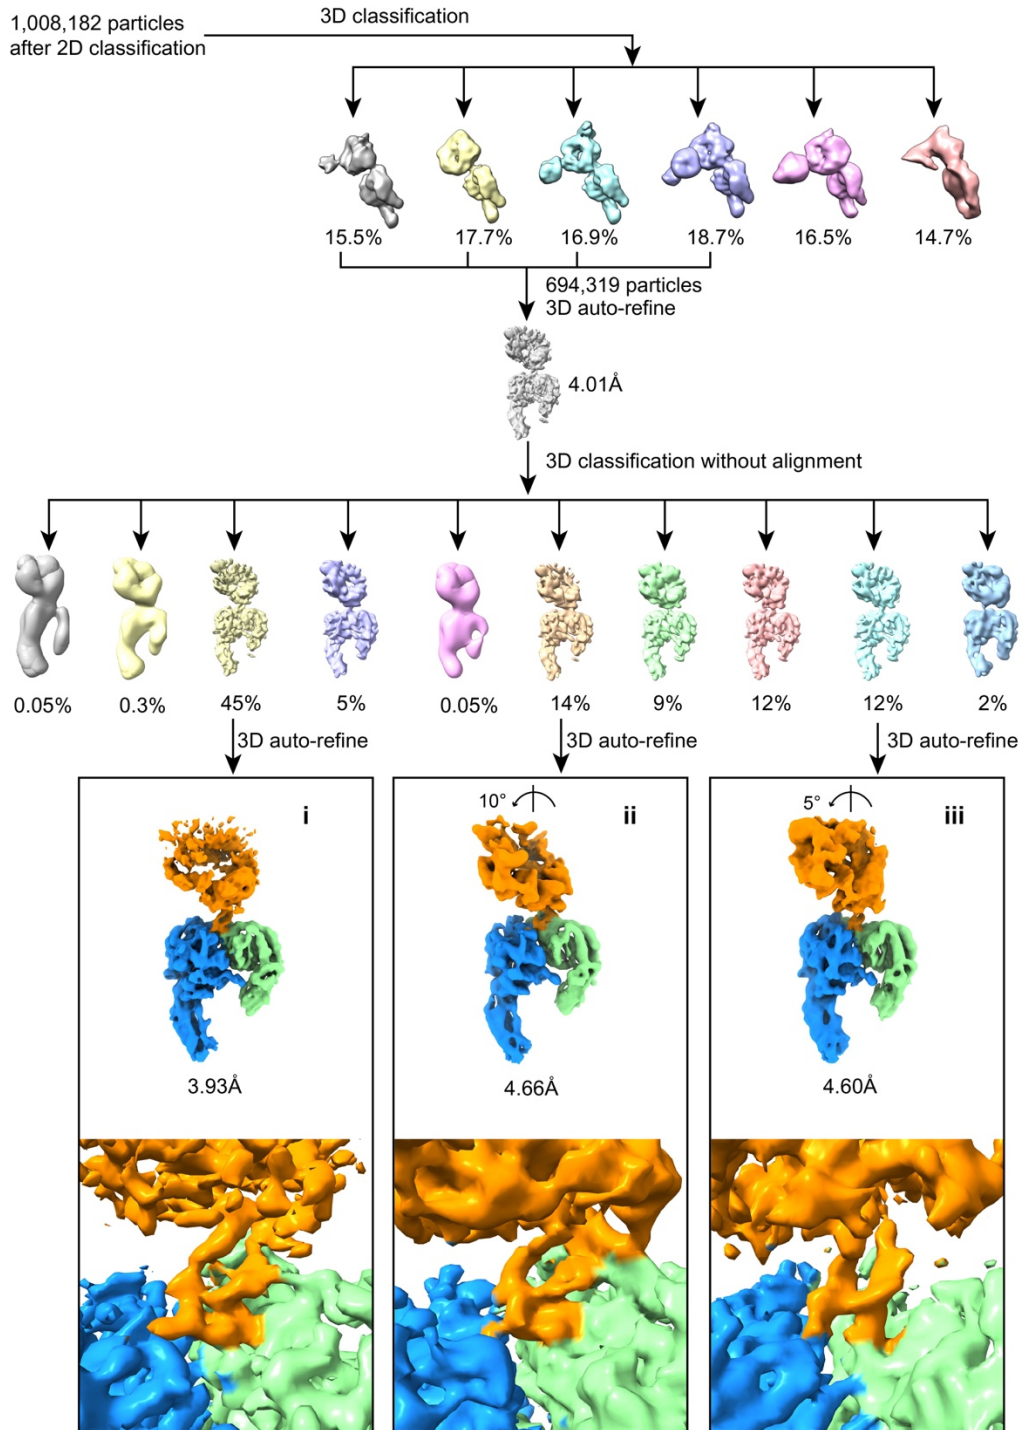

**Supplementary Fig. 7 Structural plasticity analysis of the  $\alpha_v\beta_8$ /L-TGF- $\beta_1$  complex.**

Exquisite 3D classification specific to the 1:2  $\alpha_v\beta_8$ /L-TGF- $\beta_1$  complex in our dataset. The EM densities of L-TGF- $\beta_1$  and the relative position between  $\alpha_v\beta_8$  and L-TGF- $\beta_1$  varied considerably between different subclasses, especially for the three classes with relatively higher resolution.

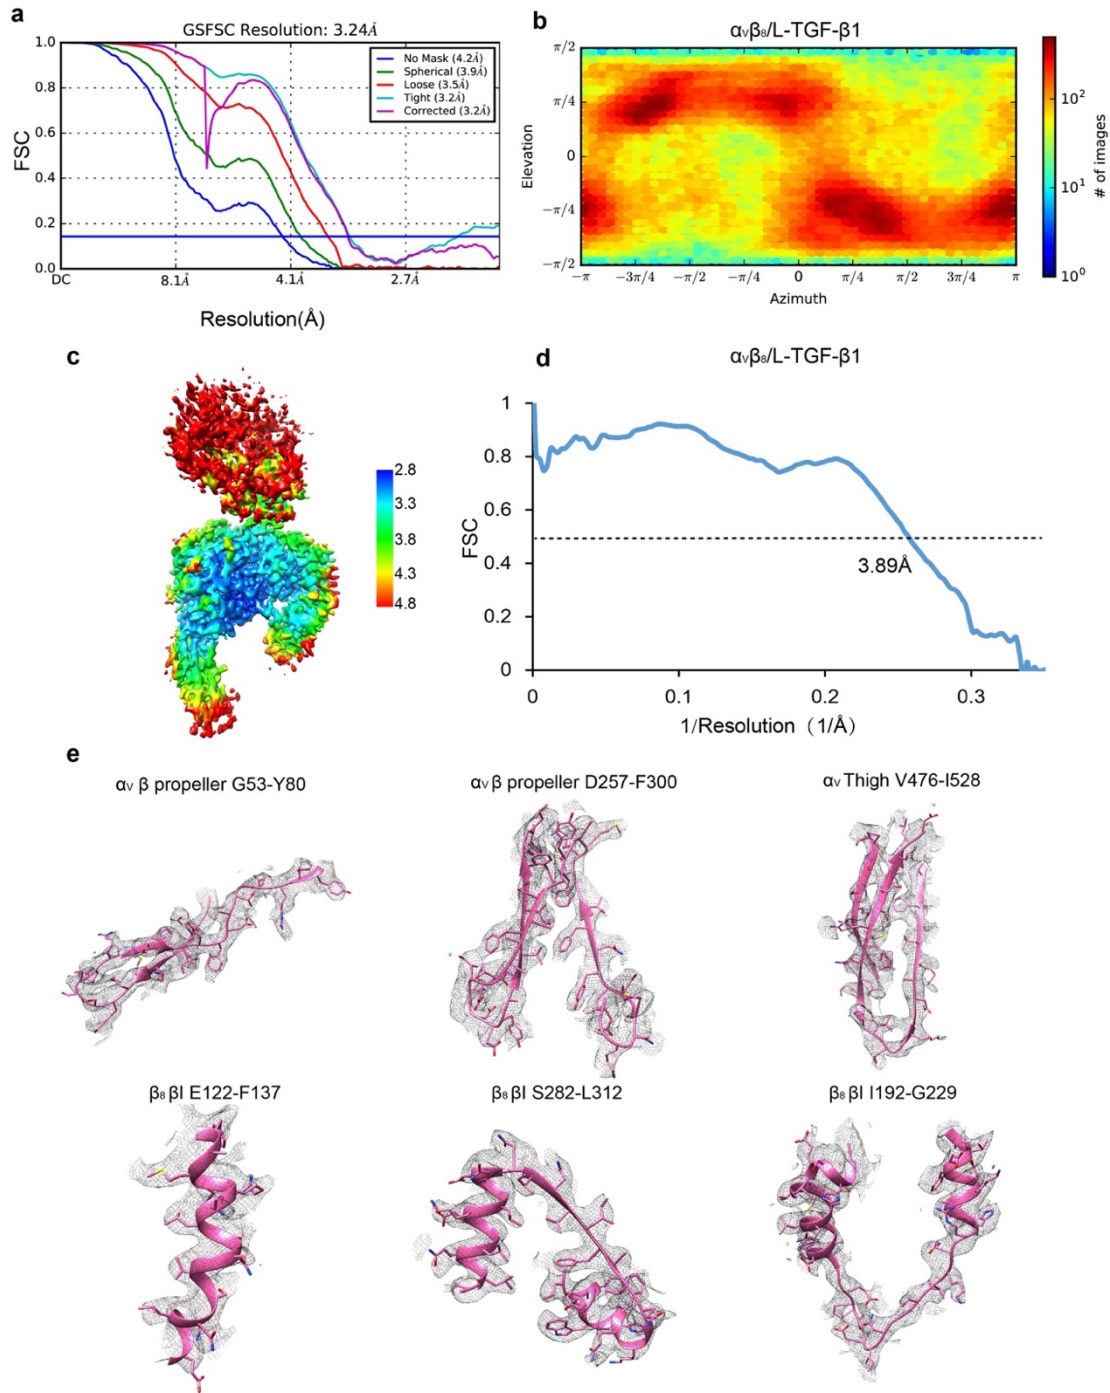

**Supplementary Fig. 8 Assessment of the cryo-EM data and structural model for the  $\alpha_v\beta_8/L$ -TGF- $\beta_1$  complex.**

**a** Fourier Shell Correlation (FSC) curves between reconstructions of two half-datasets. **b** Angular distributions of all the particles used for reconstruction. **c** Local resolution estimation of the cryo-EM map. The contour level is 0.223. **d** FSC curve between the refined structure and the cryo-EM map. **e** Representative cryo-EM densities of different regions. The contour level is 0.703.

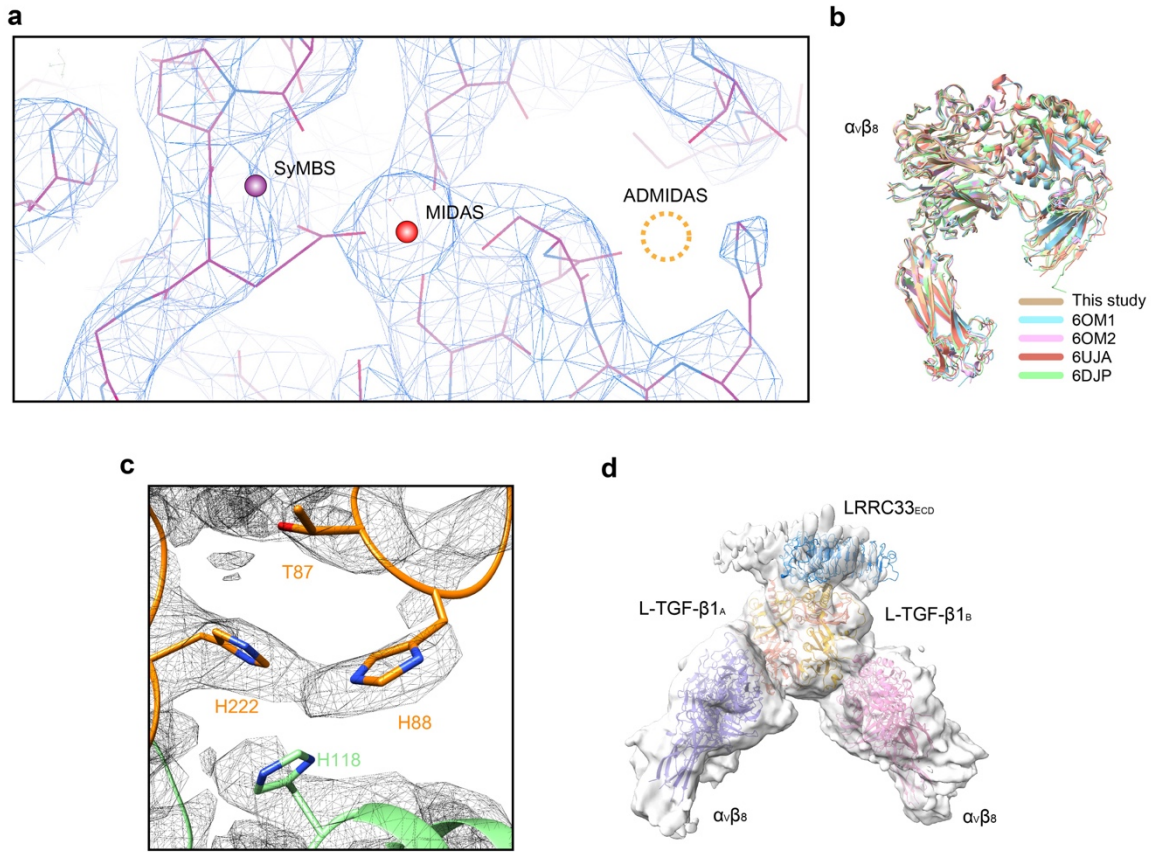

**Supplementary Fig. 9 Structural analyses of the  $\alpha_v\beta_8$ /L-TGF- $\beta$ 1/LRRC33 complex.**

**a** Metal ion is absent in the ADMIDAS (dashed circle). Cryo-EM densities around the MIDAS (red) and SyMBS (purple) cations are shown as blue meshes. The contour level is 0.704. The adjacent residues are shown as sticks. **b** Superposition of currently reported integrin  $\alpha_v\beta_8$  structures. 6DJP and 6OM1:  $\alpha_v\beta_8$  alone; 6OM2:  $\alpha_v\beta_8$  in complex with L-TGF- $\beta$ 1 ligand peptide; 6UJA:  $\alpha_v\beta_8$  in complex with porcine L-TGF- $\beta$ 1. **c** Cryo-EM densities around Thr87, His88, and His222 of L-TGF- $\beta$ 1 and His118 of integrin  $\beta_8$  subunit, are shown as black meshes. The contour level is 0.703. L-TGF- $\beta$ 1 and integrin  $\beta_8$  are colored in orange and green, respectively. **d** Assembly of the 2:2:1  $\alpha_v\beta_8$ /L-TGF- $\beta$ 1/LRRC33 structure model by fitting the obtained structures of  $\alpha_v\beta_8$ /L-TGF- $\beta$ 1 and L-TGF- $\beta$ 1/LRRC33 into the medium-resolution cryo-EM map in Supplementary Fig. 6. The structures are shown in ribbon presentation and the EM map is shown as semitransparent surface. The contour level of the map is 0.006.

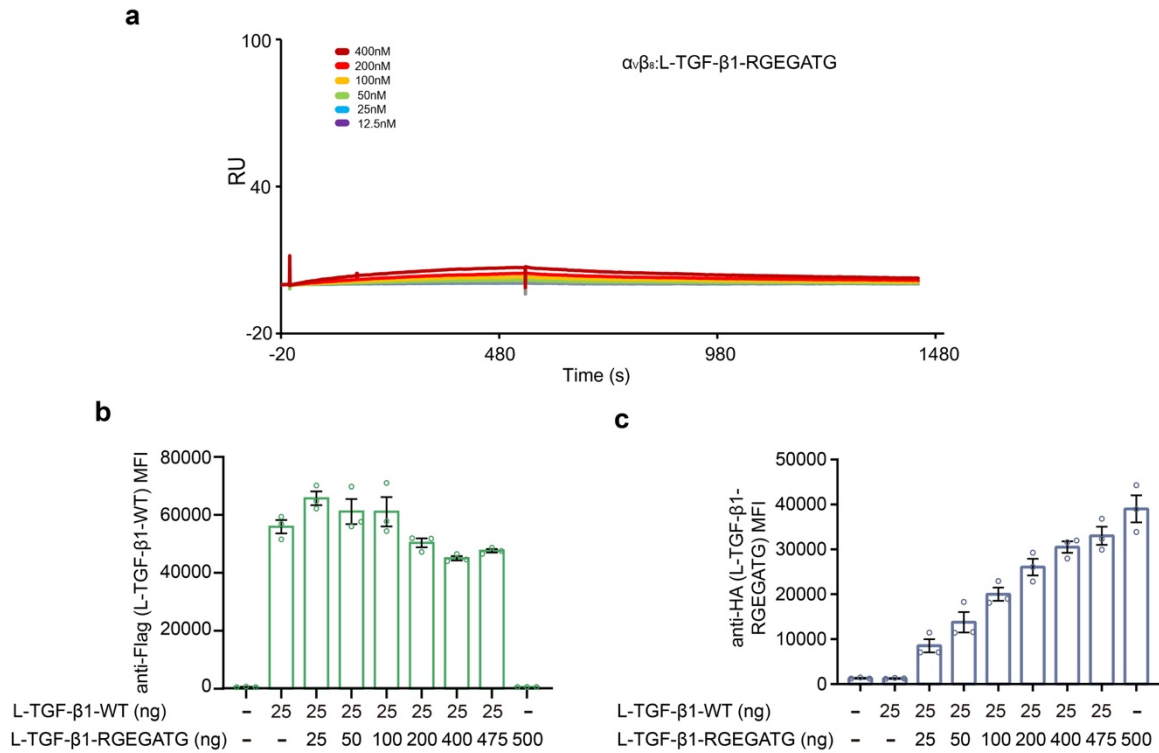

**Supplementary Fig. 10 Functional validation of the 2:2  $\alpha_v\beta_8$ /L-TGF- $\beta$ 1 binding model.**

**a** SPR result showing the L-TGF- $\beta$ 1-RGEGATG variant cannot bind integrin  $\alpha_v\beta_8$ . **b-c** Surface expression levels of L-TGF- $\beta$ 1 in cells with different transfected ratios of WT and mutated constructs (calibrated by the MFI values). All experiments were done in triplicate (n = 3 biologically independent experiments, mean  $\pm$  s.d.). Source data are provided as a Source Data file.

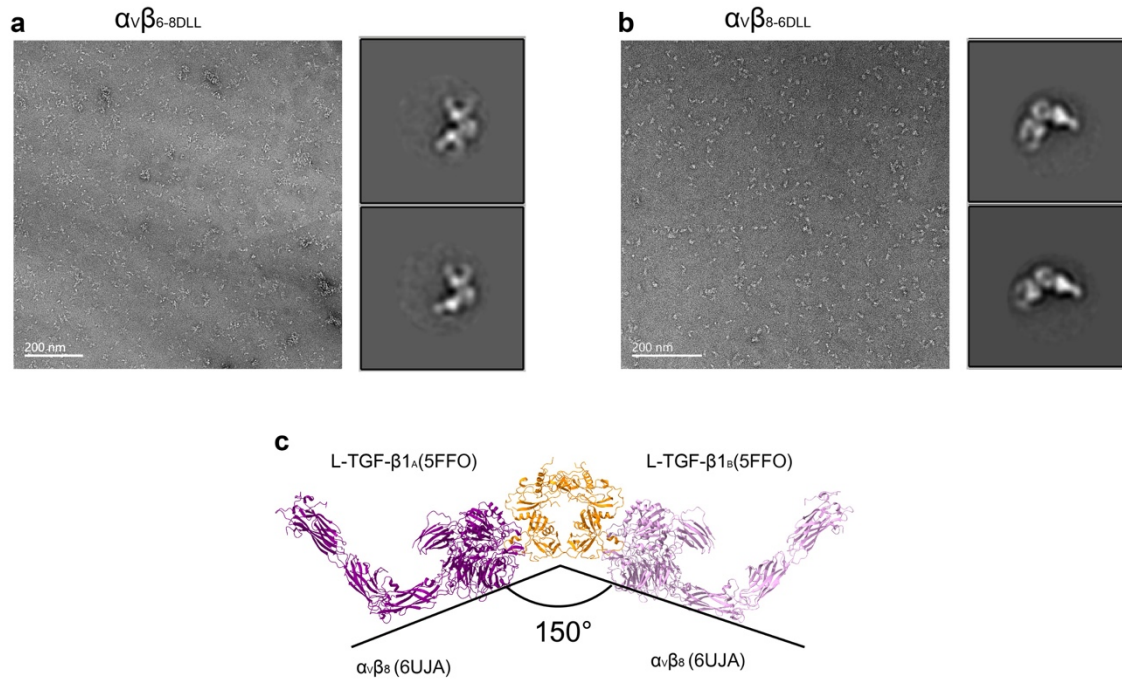

**Supplementary Fig. 11 Structural analyses of different integrin/L-TGF- $\beta$ 1 complexes.**

**a** The representative raw micrograph and 2D classes of the  $\alpha_v\beta_6$ -8DLL/L-TGF- $\beta$ 1 complex.  $\alpha_v\beta_6$ -8DLL adopts an open conformation. 22 micrographs were collected and processed for this dataset.

**b** The representative raw micrograph and 2D classes of the  $\alpha_v\beta_8$ -6DLL/L-TGF- $\beta$ 1 complex.  $\alpha_v\beta_8$ -6DLL adopts a closed conformation. 70 micrographs were collected and processed for this dataset.

**c** A modeled structure of the 2:2  $\alpha_v\beta_8$ /L-TGF- $\beta$ 1 complex based on the symmetric operation of the reported 1:2  $\alpha_v\beta_8$ /L-TGF- $\beta$ 1 structure (PDB code: 6UJA). The intact L-TGF- $\beta$ 1 structure is derived from that in the 1:2  $\alpha_v\beta_6$ /L-TGF- $\beta$ 1 complex (PDB code: 5FFO). The lower leg of integrin  $\alpha_v$  (PDB code: 6AVU) is integrated into this model.

**Supplementary Table 1. Cryo-EM data collection, refinement and validation statistics.**

|                                                     | L-TGF- $\beta$ 1/LRRC33<br>(EMDB-33571)<br>(PDB 7Y1R) | $\alpha_v\beta_8$ /L-TGF- $\beta$ 1<br>(EMDB-33572)<br>(PDB 7Y1T) | $\alpha_v\beta_8$ /L-TGF- $\beta$ 1/LRRC33<br>(EMDB-33573) |
|-----------------------------------------------------|-------------------------------------------------------|-------------------------------------------------------------------|------------------------------------------------------------|
| <b>Data collection and processing</b>               |                                                       |                                                                   |                                                            |
| Magnification                                       | 130,000                                               | 130,000                                                           | 130,000                                                    |
| Voltage (kV)                                        | 300                                                   | 300                                                               | 300                                                        |
| Electron exposure (e <sup>-</sup> /Å <sup>2</sup> ) | 57.5                                                  | 57.5                                                              | 57.5                                                       |
| Defocus range (μm)                                  | 1.0-3.0                                               | 1.0-3.0                                                           | 1.0-3.0                                                    |
| Pixel size (Å)                                      | 1.055                                                 | 1.055                                                             | 1.055                                                      |
| Symmetry imposed                                    | C1                                                    | C1                                                                | C1                                                         |
| Initial particle images (no.)                       | 1,250,966                                             | 1,902,181                                                         | 1,902,181                                                  |
| Final particle images (no.)                         | 254,673                                               | 305,011                                                           | 410,538                                                    |
| Map resolution (Å)                                  | 4.01                                                  | 3.24                                                              | 5.19                                                       |
| FSC threshold                                       | 0.143                                                 | 0.143                                                             | 0.143                                                      |
| Map resolution range (Å)                            | 3.4-14                                                | 2.8-12                                                            | 4.2-21.3                                                   |
| <b>Refinement</b>                                   |                                                       |                                                                   |                                                            |
| Initial model used (PDB code)                       | 6GFF                                                  | 6UJA                                                              |                                                            |
| Model resolution (Å)                                | 4.82                                                  | 3.89                                                              |                                                            |
| FSC threshold                                       | 0.5                                                   | 0.5                                                               |                                                            |
| Model resolution range (Å)                          | -                                                     | -                                                                 |                                                            |
| Map sharpening <i>B</i> factor (Å <sup>2</sup> )    | -                                                     | 64.6                                                              |                                                            |
| Model composition                                   |                                                       |                                                                   |                                                            |
| Non-hydrogen atoms                                  | 8,565                                                 | 8,112                                                             |                                                            |
| Protein residues                                    | 1,041                                                 | 1,030                                                             |                                                            |
| Ligands                                             | -                                                     | -                                                                 |                                                            |
| <i>B</i> factors (Å <sup>2</sup> )                  |                                                       |                                                                   |                                                            |
| Protein                                             | 77.88                                                 | 82.93                                                             |                                                            |
| Ligand                                              | -                                                     | -                                                                 |                                                            |
| R.m.s. deviations                                   |                                                       |                                                                   |                                                            |
| Bond lengths (Å)                                    | 0.002                                                 | 0.002                                                             |                                                            |
| Bond angles (°)                                     | 0.619                                                 | 0.518                                                             |                                                            |
| Validation                                          |                                                       |                                                                   |                                                            |
| MolProbity score                                    | 1.86                                                  | 1.73                                                              |                                                            |
| Clashscore                                          | 8.73                                                  | 8.09                                                              |                                                            |
| Poor rotamers (%)                                   | 0.00                                                  | 0.00                                                              |                                                            |
| Ramachandran plot                                   |                                                       |                                                                   |                                                            |
| Favored (%)                                         | 94.20                                                 | 95.86                                                             |                                                            |
| Allowed (%)                                         | 5.80                                                  | 4.14                                                              |                                                            |
| Disallowed (%)                                      | 0.00                                                  | 0.00                                                              |                                                            |
